# Supplementary material
Source: MDPI journal article supplement (https://www.mdpi.com/2624-862X/3/4/48)
Supplement: s1 [file s1]

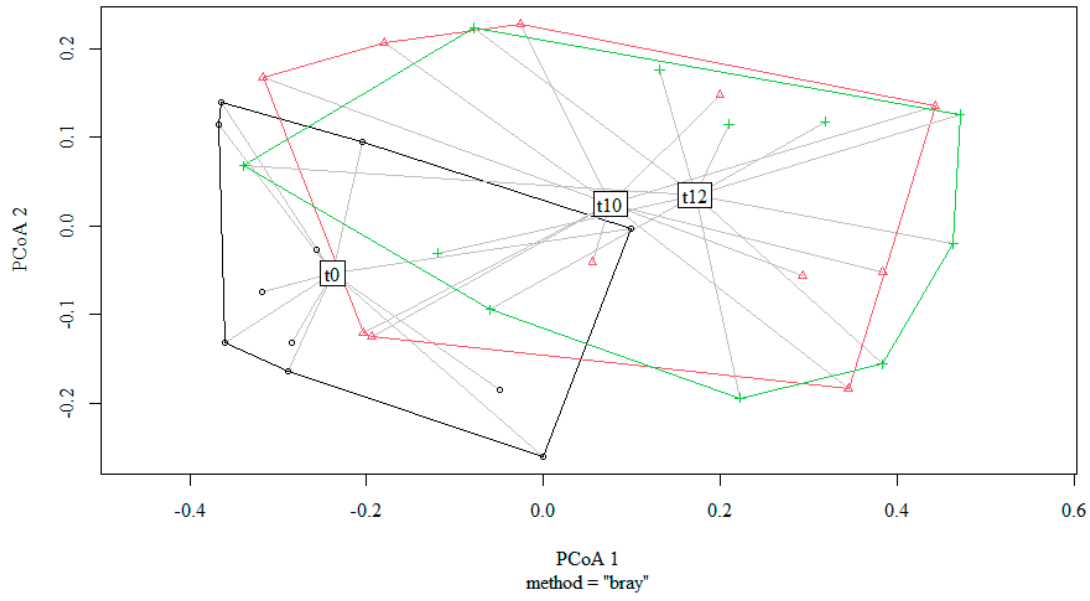

**Figure S3:** Beta-dispersion plot of raw milk samples at t0 (black line) and at the two different temperatures of storage (T10, T12) (red and green line, respectively). Lines represented convex hulls enclosing each group's data points.
