# Supplementary material
Source: MDPI journal article supplement (https://www.mdpi.com/2624-862X/3/4/48)
Supplement: s1 [file s1]

Archive with 4 entries (4 files):
- Fig.S1.pdf
- Fig.S2.pdf
- Fig.S3.pdf
- Table S1.pdf
