# Supplementary material
Source: MDPI journal article supplement (https://www.mdpi.com/2624-862X/3/4/48)
Supplement: s1 [file s1]

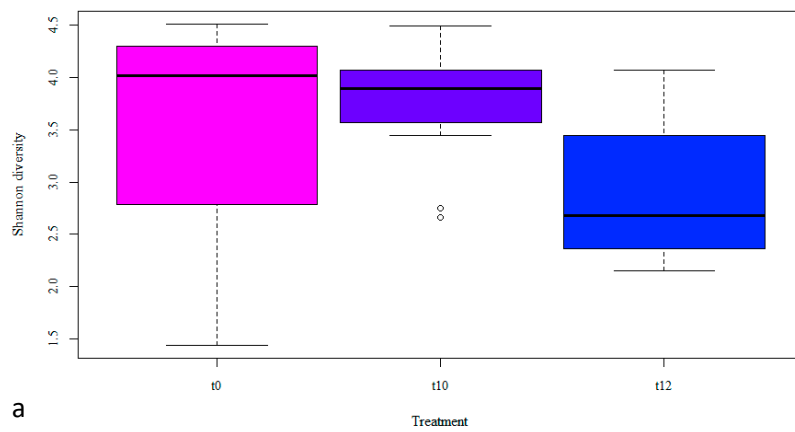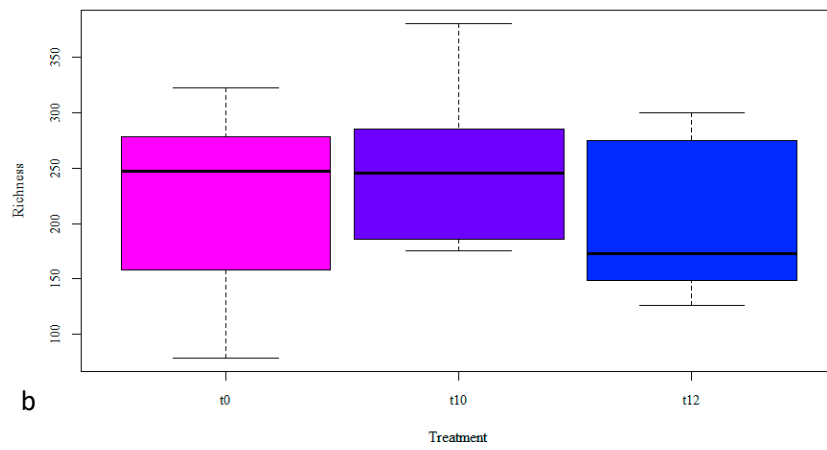

**Figure S2:** Alpha diversity indexes of raw milk samples at t0 (pink bar) and at the two different temperature of storage (T10, T12) (violet and blue bar, respectively): **(a)** Shannon diversity (d.f. = 2,  $F = 2.97$ ,  $p = 0.06$ ); **(b)** Richness (d.f. = 2,  $F = 0.84$ ,  $p = 0.44$ ).
