# Supplementary material
Source: MDPI journal article supplement (https://www.mdpi.com/2624-862X/3/4/48)
Supplement: s1 [file s1 › Fig.S1.pdf]

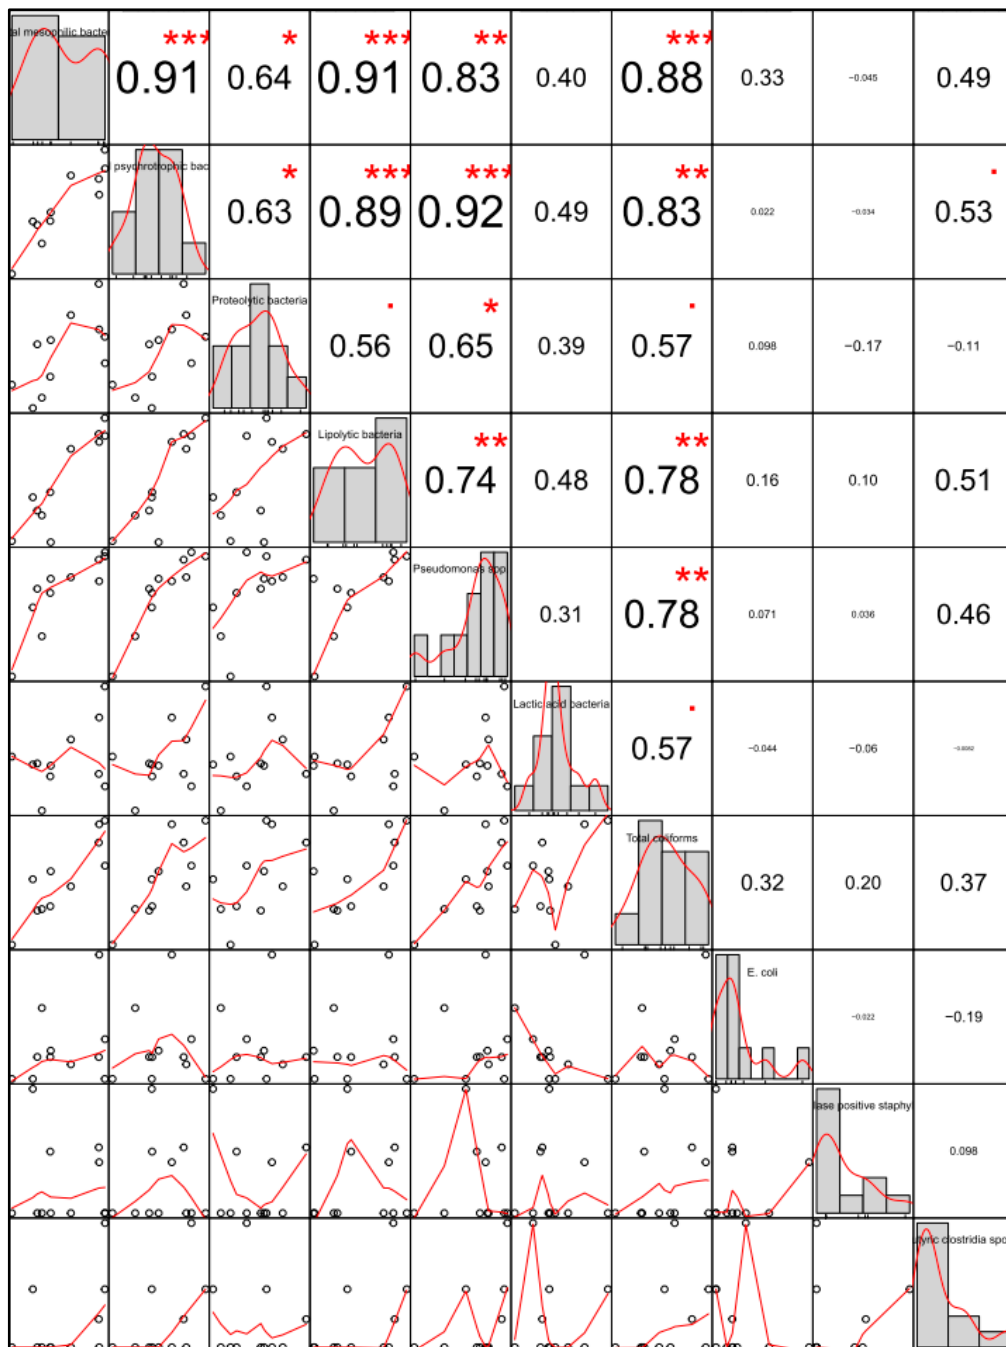

A – storage T10 (15 h at 10 °C, 45 h at 4 °C)

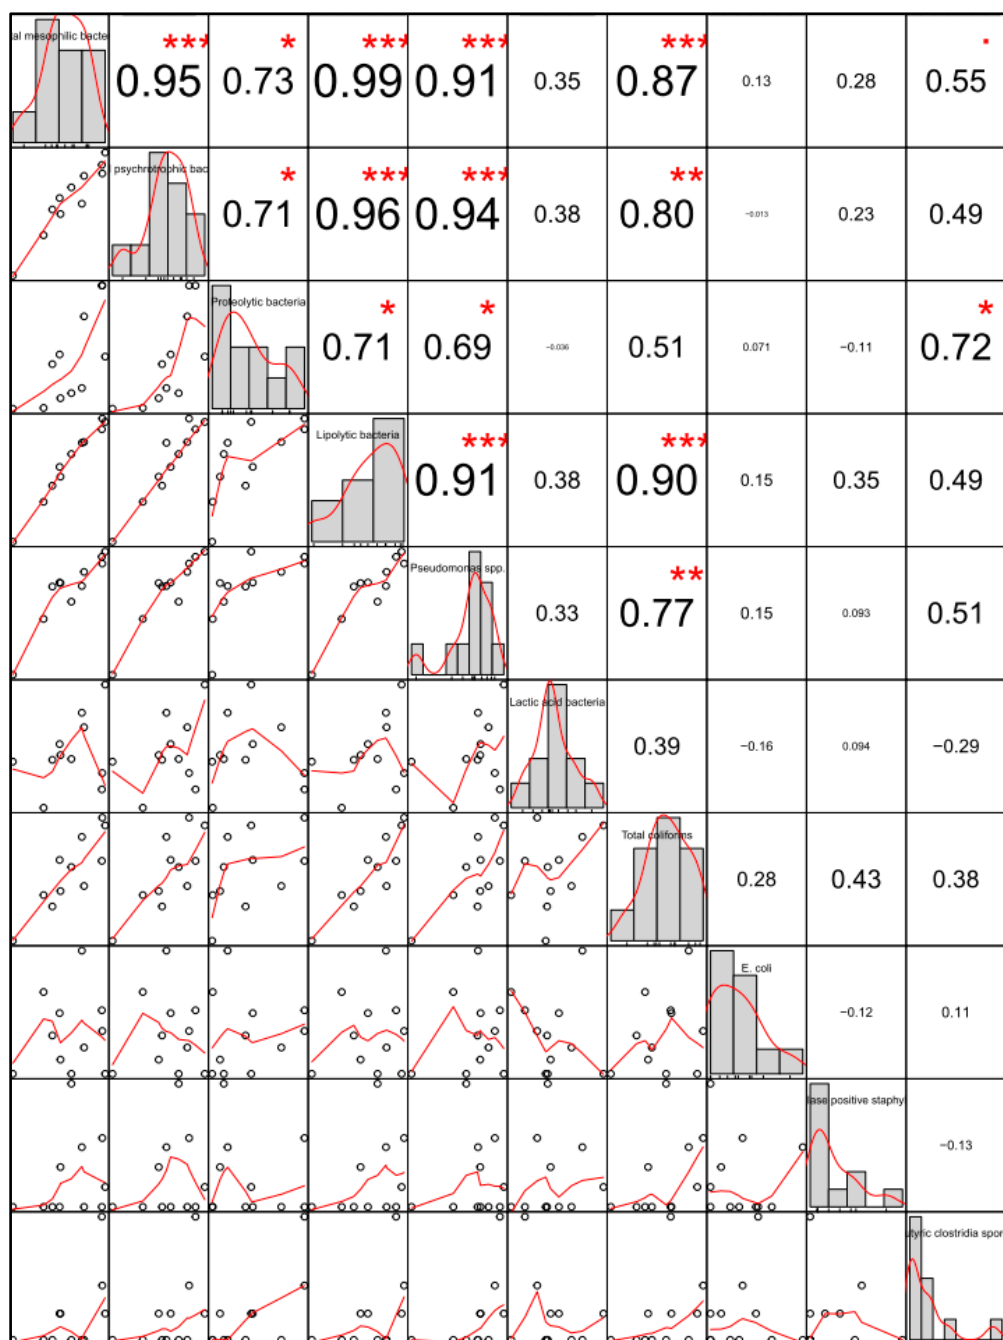

B – storage T12 (15 h at 12 °C, 45 h at 4 °C)

**Figure S1.** Dynamics of bacterial populations in raw milk samples ( $n = 11$ ) stored under T10 (A) and T12 (B) conditions. Correlation among bacterial counts evaluated by the Pearson test (" $r$ " is indicated by numbers; " $P$ " as \*\*\* < 0.001, \*\* < 0.01, \* < 0.05). Red line indicated the regression curve, dot indicated the samples and bars indicated the frequency distribution of each variable (bacterial species)
