# Supplementary material
Source: MDPI journal article supplement (https://www.mdpi.com/2624-862X/3/4/48)
Supplement: s1 [file s1 › Table S1.pdf]

**Table S1:** Subdominant genera ordered for relative abundance from the most to the less abundant.

|                                  |                                |                                 |                                |
|----------------------------------|--------------------------------|---------------------------------|--------------------------------|
| 1. <i>Butyrivibrio</i>           | 42. <i>Xanthomonas</i>         | 83. <i>Alteromonadaceae</i>     | 124. <i>Nocardioidea</i>       |
| 2. <i>Actinomycetales</i>        | 43. <i>Serinicoccus</i>        | 84. <i>Gordonia</i>             | 125. <i>Microtholus</i>        |
| 3. <i>Lachnospiraceae</i>        | 44. <i>Deinococcus</i>         | 85. <i>Alcaligenaceae</i>       | 126. <i>Anaerospira</i>        |
| 4. <i>Bacteroidales</i>          | 45. <i>Tessaracoccus</i>       | 86. <i>Euryarchaeota</i>        | 127. <i>Flavobacteriales</i>   |
| 5. <i>Coprococcus</i>            | 46. <i>Pseudomonadaceae</i>    | 87. <i>Alkaliphilus</i>         | 128. <i>Dermatophilus</i>      |
| 6. <i>Oscillospira</i>           | 47. <i>Ruminobacter</i>        | 88. <i>Gramella</i>             | 129. <i>Leuconostoc</i>        |
| 7. <i>Alkalibacterium</i>        | 48. <i>Microbacteriaceae</i>   | 89. <i>Actinobacteria</i>       | 130. <i>Rhodococcus</i>        |
| 8. <i>Dorea</i>                  | 49. <i>Proteobacteria</i>      | 90. <i>Parapedobacter</i>       | 131. <i>Oleibacter</i>         |
| 9. <i>Rikenella</i>              | 50. <i>Pedobacter</i>          | 91. <i>Eubacterium</i>          | 132. <i>Novosphingobium</i>    |
| 10. <i>Leucobacter</i>           | 51. <i>Lewinella</i>           | 92. <i>Lysinibacillus</i>       | 133. <i>Verrucomicrobium</i>   |
| 11. <i>Phascolarctobacterium</i> | 52. <i>Parabacteroides</i>     | 93. <i>Pseudoclavibacter</i>    | 134. <i>Gallionella</i>        |
| 12. <i>Peptoniphilus</i>         | 53. <i>Yaniella</i>            | 94. <i>Jonesia</i>              | 135. <i>Alcanivorax</i>        |
| 13. <i>Mogibacterium</i>         | 54. <i>Olsenella</i>           | 95. <i>Agrobacterium</i>        | 136. <i>Azoarcus</i>           |
| 14. <i>Phycococcus</i>           | 55. <i>Halomonas</i>           | 96. <i>Desulfobulbus</i>        | 137. <i>Demequina</i>          |
| 15. <i>Soehngenella</i>          | 56. <i>Janthinobacterium</i>   | 97. <i>Cellovibrio</i>          | 138. <i>Dermacoccus</i>        |
| 16. <i>Sphingobacterium</i>      | 57. <i>Chitinophagaceae</i>    | 98. <i>Mycoplasma</i>           | 139. <i>Megamonas</i>          |
| 17. <i>Dietzia</i>               | 58. <i>Bulleidia</i>           | 99. <i>Pseudaminobacter</i>     | 140. <i>Rheinheimera</i>       |
| 18. <i>Blautia</i>               | 59. <i>Fusobacterium</i>       | 100. <i>Faecalibacterium</i>    | 141. <i>Propionibacterium</i>  |
| 19. <i>Clostridia</i>            | 60. <i>Deltaproteobacteria</i> | 101. <i>Aminobacter</i>         | 142. <i>Peptostreptococcus</i> |
| 20. <i>Archaea</i>               | 61. <i>Comamonas</i>           | 102. <i>Aequorivita</i>         | 143. <i>Citrobacter</i>        |
| 21. <i>Turicibacter</i>          | 62. <i>Marinobacter</i>        | 103. <i>Microbacterium</i>      | 144. <i>Acidovorax</i>         |
| 22. <i>Luteimonas</i>            | 63. <i>Nostocophycideae</i>    | 104. <i>Aeromicrobium</i>       | 145. <i>Paenibacillus</i>      |
| 23. <i>Ruminococcaceae</i>       | 64. <i>Denitrobacter</i>       | 105. <i>Xanthomonadaceae</i>    | 146. <i>Campylobacter</i>      |
| 24. <i>Paraprevotella</i>        | 65. <i>Cellulomonas</i>        | 106. <i>Vibrio</i>              | 147. <i>Mycoplana</i>          |
| 25. <i>Prevotella</i>            | 66. <i>Rhodobacteraceae</i>    | 107. <i>Staphylococcaceae</i>   | 148. <i>Virgibacillus</i>      |
| 26. <i>Akkermansia</i>           | 67. <i>Phyllobacteriaceae</i>  | 108. <i>Fibrobacter</i>         | 149. <i>Chitinophaga</i>       |
| 27. <i>Anaerostipes</i>          | 68. <i>Devosia</i>             | 109. <i>Rothia</i>              | 150. <i>Gluconacetobacter</i>  |
| 28. <i>Treponema</i>             | 69. <i>Peptococcus</i>         | 110. <i>Pediococcus</i>         | 151. <i>Bacillaceae</i>        |
| 29. <i>Weissella</i>             | 70. <i>Anaerofilum</i>         | 111. <i>Vibrionaceae</i>        | 152. <i>Alishewanella</i>      |
| 30. <i>Olivibacter</i>           | 71. <i>Sphingomonas</i>        | 112. <i>Dyadobacter</i>         | 153. <i>Tepidimicrobium</i>    |
| 31. <i>Firmicutes</i>            | 72. <i>Rhodobacter</i>         | 113. <i>Desulfovibrio</i>       | 154. <i>Kaistella</i>          |
| 32. <i>Paracoccus</i>            | 73. <i>Janibacter</i>          | 114. <i>Anaerovibrio</i>        | 155. <i>Methylobacter</i>      |
| 33. <i>Nesterenkonia</i>         | 74. <i>Acidimicrobiaceae</i>   | 115. <i>Alphaproteobacteria</i> | 156. <i>Defluviobacter</i>     |
| 34. <i>Rhodanobacter</i>         | 75. <i>Stenotrophomonas</i>    | 116. <i>Natronobacillus</i>     | 157. <i>Steroidobacter</i>     |
| 35. <i>Knoellia</i>              | 76. <i>Erysipelotrichales</i>  | 117. <i>Anaerotruncus</i>       | 158. <i>Actinobaculum</i>      |
| 36. <i>Micrococcus</i>           | 77. <i>Planctomyces</i>        | 118. <i>Anaerolinaceae</i>      | 159. <i>Methylobacter</i>      |
| 37. <i>Marinospirillum</i>       | 78. <i>Succinivibrio</i>       | 119. <i>Comamonadaceae</i>      | 160. <i>Sneathia</i>           |
| 38. <i>Paludibacter</i>          | 79. <i>Alteromonadaceae</i>    | 120. <i>Georgenella</i>         | 161. <i>Spirosoma</i>          |
| 39. <i>Erysipelotrichaceae</i>   | 80. <i>Erysipelotrichales</i>  | 121. <i>Hydrogenophaga</i>      | 162. <i>Zoogloea</i>           |
| 40. <i>Methanobrevibacter</i>    | 81. <i>Planctomyces</i>        | 122. <i>Coprothecillus</i>      | 163. <i>Yersinia</i>           |
| 41. <i>Anaerococcus</i>          | 82. <i>Succinivibrio</i>       | 123. <i>Pontibacter</i>         |                                |
